# Supplementary material for: Self-standing SnS nanosheet array: a bifunctional binder-free thin film catalyst for electrochemical hydrogen generation and wastewater treatment
Source: Royal Society of Chemistry journal article supplement (doi:10.1039/d1dt01855h), 2021-01-01
Supplement: d1dt01855h1.pdf [file d1dt01855h1.pdf]

## **Electronic Supplementary Material**

### **Self-standing SnS nanosheet array: A bifunctional binder-free thin film catalyst for electrochemical hydrogen generation and waste-water treatment**

Supriya A. Patil,<sup>a</sup> Hoa Thi Bui,<sup>b</sup> Sajjad Hussain,<sup>a</sup> Iqra Rabani,<sup>a</sup> Yongho Seo,<sup>a</sup> Jongwan Jung,<sup>a</sup> Nabeen K Shrestha,<sup>c\*</sup> Hyungsang Kim,<sup>c\*</sup> Hyunsik Im<sup>\*c</sup>

<sup>a</sup> *Department of Nanotechnology and Advanced Materials Engineering, Sejong University, Seoul 05006, Republic of Korea.*

<sup>b</sup> *Institute of Materials Science, Vietnam Academy of Science and Technology, 18 Hoang Quoc Viêt, Cau Giay, Ha Noi, Viet Nam.*

<sup>c</sup> *Division of Physics and Semiconductor Science, Dongguk University, Seoul 04620, Republic of Korea.*

---

\*Corresponding authors. Nabeen K. Shrestha (nabeenkshrestha@hotmail.com), Hyungsang Kim (hskim@dongguk.edu), Hyunsik Im (hyunsik7@dongguk.edu)

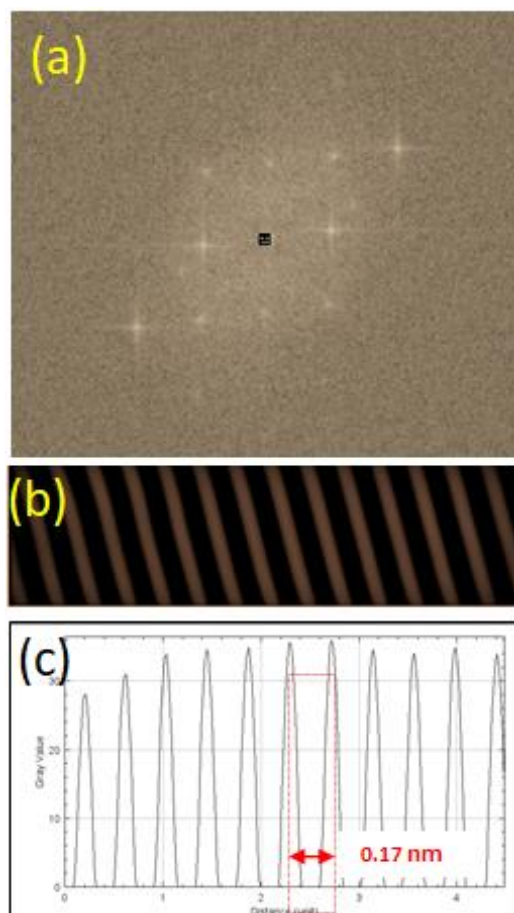

**Figure S1.** (a) Fast Fourier transform (FFT) of the selected region of the HRTEM image of SnS film (b) inverse FFT of the selected region of the HRTEM image, and (c) line profile for the selected line in its inverse FFT image indicating the d spacing as 0.17 nm.

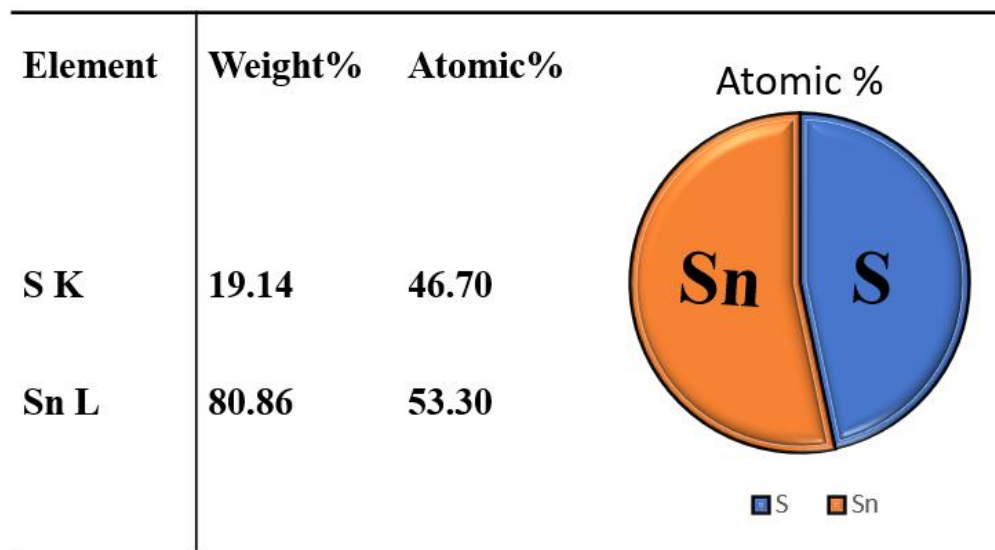

**Figure S2.** (a) Percentage vs. elements plotted figure calculated from energy-dispersive X-ray spectroscopy (EDX) analysis spectrum showed a stoichiometric ratio of Sn:S is 1:1.

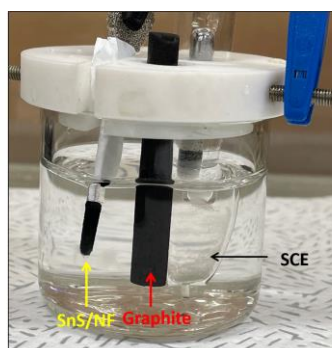

**Figure S3.** Photograph of an electrolyzer with graphite cathode, SnS/NF anode and SCE reference electrode in aqueous 1 M KOH + 0.33 M urea electrolyte.

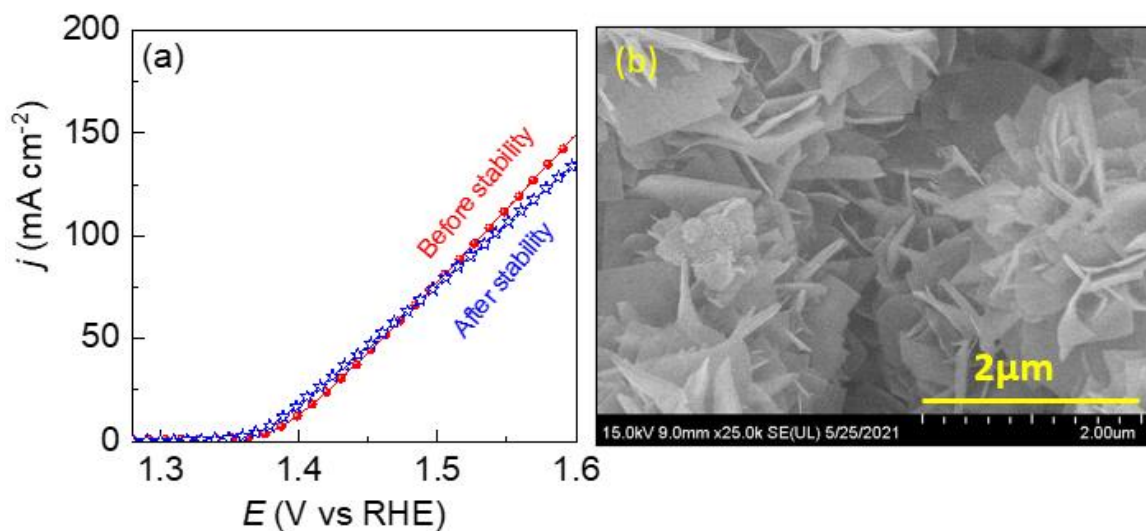

**Figure S4.** (a) Linear sweep voltammograms of the 1 M aqueous KOH electrolyzer consisting of the SnS/NF (+) || Graphite (-) assembly with a reference SCE before and after the long-term electrochemical durability test. (b) SEM image of the SnS film after the stability analysis.

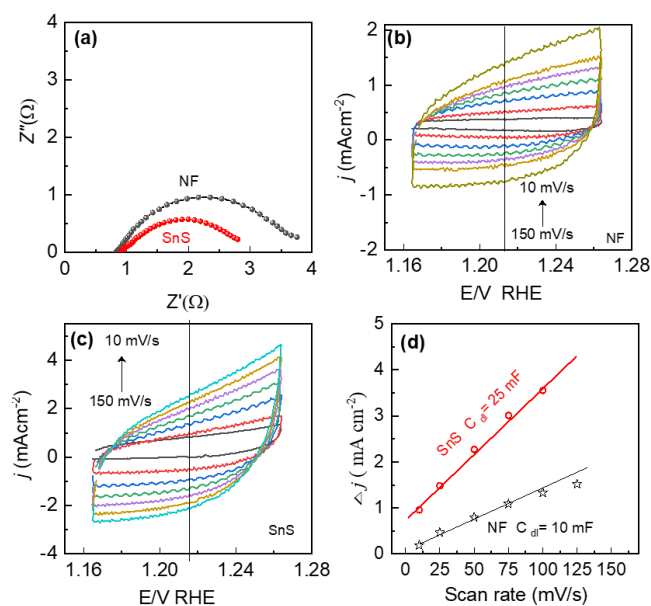

**Figure S5.** Electrochemical impedance spectroscopy and  $C_{dl}$  of the SnS and NF electrodes in 1 M KOH + 0.33 M urea: (a) Nyquist plots showing the improved electron transport. (b, c) CV plots of electrodes in a non-faradaic region at various scan rates ranging from 10 to 150  $\text{mV s}^{-1}$ . (d) Plot

showing the SnS/NF catalyst having a considerably larger  $C_{dl}$  value (25mF) as compared to the bare NF-substrate (10 mF).

**Table S1.** Comparison of OER performance of the SnS catalyst with the recently reported transition metal-based metal catalysts.

| No | Catalyst                                                  | $\eta$ (mV)@ $j$ (mAcm <sup>-2</sup> ) | Substrate              | Electrolyte (Molar of KOH) | Reference |
|----|-----------------------------------------------------------|----------------------------------------|------------------------|----------------------------|-----------|
|    | SnS                                                       | 280@10                                 | NF                     | 1M                         | This work |
|    | SnS                                                       | 340 @50                                | NF                     | 1M                         | This work |
| 1  | (Ni <sub>0.33</sub> Co <sub>0.6</sub> ) S <sub>2</sub> NW | 295@100                                | CC                     | 1M                         | 1         |
| 2  | MoS <sub>2</sub> -NiS <sub>2</sub>                        | 249@10                                 | NF                     | 1M                         | 2         |
| 3  | Co <sub>3</sub> S <sub>4</sub> @MoS <sub>2</sub>          | 310@10                                 | GC                     | 1M                         | 3         |
| 4  | 3D porous graphene film@NiCo <sub>2</sub> S <sub>4</sub>  | 264@10                                 | Graphene film          | 1M                         | 4         |
| 5  | NiCoMnS <sub>4</sub> /rGO                                 | 410@10                                 | Reduced graphene oxide | 1M                         | 5         |
| 6  | NiCo <sub>2</sub> S <sub>4</sub>                          | 340@10                                 | NF                     | 1M                         | 6         |
| 7  | CuCo <sub>2</sub> S <sub>4</sub>                          | 310@10                                 | NA                     | 1M                         | 7         |
| 8  | NiFeS                                                     | 286@10                                 | Graphene framework     | 0.1 M                      | 8         |
| 9  | Mn-Cd-S@amorphous-Ni <sub>3</sub> S <sub>2</sub>          | 333@10                                 | Reduced graphene oxide | 1 M                        | 9         |
| 10 | Ultrathin Co <sub>3</sub> S <sub>4</sub> nanosheet        | 280@onset potential                    | na                     | 0.1 M                      | 10        |
| 11 | NiCo <sub>2</sub> S <sub>4</sub> /N-CNT                   | 370@10                                 | Carbon nanotubes       | 0.1M                       | 11        |

**Table S2.** Comparison of HER performance of the SnS catalyst with the recently reported transition metal-based metal catalysts.

| No | Catalyst                                                                         | $\eta_{10}$ (mV) | Substrate           | Electrolyte (Molar of KOH) | Reference |
|----|----------------------------------------------------------------------------------|------------------|---------------------|----------------------------|-----------|
|    | SnS                                                                              | 214              | NF                  | 1M                         | This work |
| 1  | Ni <sub>3</sub> S <sub>2</sub> /NF                                               | 223              | NF                  | 1M                         | 12        |
| 2  | NiFeS/Ni                                                                         | 180@10           | NF                  | 1M                         | 13        |
| 3  | Ni <sub>x</sub> Co <sub>3-x</sub> S <sub>4</sub> /Ni <sub>3</sub> S <sub>2</sub> | 136@10           | NF                  | 1M                         | 14        |
| 4  | Graphene/Ni <sub>3</sub> Se <sub>2</sub> /Co <sub>9</sub> S <sub>8</sub>         | 170@20           | exfoliated graphene | 1M                         | 15        |

|    |                                                     |         |          |    |    |
|----|-----------------------------------------------------|---------|----------|----|----|
| 5  | Ni(OH) <sub>2</sub> /Ni <sub>3</sub> S <sub>2</sub> | 211@20  | NF       | 1M | 16 |
| 6  | 3D Se-(NiCo)S <sub>x</sub> /(OH) <sub>x</sub>       | 103@10  | NF       | 1M | 17 |
| 7  | Mn-Ni <sub>3</sub> S <sub>2</sub> /NF               | 152@10  | NF       | 1M | 18 |
| 8  | CoS <sub>2</sub>                                    | ~255@10 | Ti       | 1M | 19 |
| 9  | MoS <sub>2</sub>                                    | 187@10  | Graphite | 1M | 20 |
| 10 | NiCo <sub>2</sub> S <sub>4</sub> NW/NF              | 210@10  | NF       | 1M | 6  |
| 11 | Ni/NiS                                              | 230@10  | NF       | 1M | 21 |
| 12 | Sn-Ni <sub>3</sub> S <sub>2</sub> /NF               | 137@10  | NF       | 1M | 22 |
| 13 | Fe <sub>0.1</sub> -NiS <sub>2</sub> NA/Ti           | ~200@10 | Ti foil  | 1M | 23 |

**Table S3.** Comparison of UOR performance of the SnS catalyst with the recently reported transition metal-based metal catalysts.

| No | Catalyst                                         | E (V vs RHE)<br>@ <i>j</i> (mAcm <sup>-2</sup> ) | Substrate | Electrolyte<br>(Molar of<br>KOH/Urea) | Reference |
|----|--------------------------------------------------|--------------------------------------------------|-----------|---------------------------------------|-----------|
|    | SnS                                              | 1.37 @10                                         | NF        | 1/0.33                                | This work |
|    | SnS                                              | 1.43 @50                                         | NF        | 1/0.33                                | This work |
| 1  | NiCo <sub>2</sub> S <sub>4</sub> NS/Carbon cloth | 1.47@10                                          | CC        | 1/0.33                                | 24        |
| 2  | Ni <sub>3</sub> S <sub>2</sub> /NF               | 1.44@100                                         | NF        | 1/0.2                                 | 25        |
| 3  | Ni <sub>3</sub> S <sub>2</sub> @NF               | 1.35@10                                          | NF        | 1/0.5                                 | 25        |
| 4  | NiIr-MOF/NF                                      | 1.32@10                                          | NF        | 1/0.5                                 | 26        |
| 5  | NiFeCo LDH/NF                                    | ~1.35@10                                         | NF        | 1/0.33                                | 27        |
| 6  | NiSe <sub>2</sub>                                | 1.35@10                                          | NF        | 1/0.33                                | 28,       |
| 7  | NiMo /NF                                         | 1.36@10                                          | NF        | 1/0.1                                 | 29        |
| 8  | (Ni-Bi)/GC                                       | 1.42 @50                                         | GC        | 1/0.33                                | 30        |

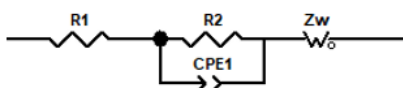

| Element               | SnS    | NF     |
|-----------------------|--------|--------|
| $R_s$ ( $\Omega$ )    | 0.9091 | 0.8504 |
| $R_{ct}$ ( $\Omega$ ) | 2.291  | 2.943  |
| CPE( $\mu$ F)         | 0.5806 | 0.5933 |
| $Z_w$ ( $\Omega$ )    | 0.3420 | 0.2562 |

**Table S4.** Fitted EIS parameters extracted from Nyquist plots of the SnS<sub>2</sub> and NF samples. The electrical circuit above the Table shows the equivalent circuit used to fit the experimentally obtained EIS spectra.

## References

- 1 Q. Zhang, C. Ye, X. L. Li, Y. H. Deng, B. X. Tao, W. Xiao, L. J. Li, N. B. Li and H. Q. Luo, *ACS Appl. Mater. Interfaces*, 2018, **10**, 27723–27733.
- 2 P. Kuang, T. Tong, K. Fan and J. Yu, *ACS Catal.*, 2017, **7**, 6179–6187.
- 3 Y. Guo, J. Tang, H. Qian, Z. Wang and Y. Yamauchi, *Chem. Mater.*, 2017, **29**, 5566–5573.
- 4 K. Qin, L. Wang, S. Wen, L. Diao, P. Liu, J. Li, L. Ma, C. Shi, C. Zhong, W. Hu, E. Liu and N. Zhao, *J. Mater. Chem. A*, 2018, **6**, 8109–8119.
- 5 A. Pendashteh, J. S. Sanchez, J. Palma, M. Anderson and R. Marcilla, *Energy Storage Mater.*, 2019, **20**, 216–224.
- 6 A. Sivanantham, P. Ganesan and S. Shanmugam, *Adv. Funct. Mater.*, 2016, **26**, 4661–4672.
- 7 M. Chauhan, K. P. Reddy, C. S. Gopinath and S. Deka, *ACS Catal.*, 2017, **7**, 5871–5879.
- 8 B. Q. Li, S. Y. Zhang, C. Tang, X. Cui and Q. Zhang, *Small*, 2017, **13**, 1–6.
- 9 Z. Li, X. Wang, X. Wang, Y. Lin, A. Meng, L. Yang and Q. Li, *Appl. Surf. Sci.*, 2019, **491**, 799–806.
- 10 Y. Liu, C. Xiao, M. Lyu, Y. Lin, W. Cai, P. Huang, W. Tong, Y. Zou and Y. Xie, *Angew. Chemie*, 2015, **127**, 11383–11387.
- 11 X. Han, X. Wu, C. Zhong, Y. Deng, N. Zhao and W. Hu, *Nano Energy*, 2017, **31**, 541–550.
- 12 L. L. Feng, G. Yu, Y. Wu, G. D. Li, H. Li, Y. Sun, T. Asefa, W. Chen and X. Zou, *J. Am. Chem. Soc.*, 2015, **137**, 14023–14026.
- 13 P. Ganesan, A. Sivanantham and S. Shanmugam, *J. Mater. Chem. A*, 2016, **4**, 16394–16402.
- 14 Y. Wu, Y. Liu, G. D. Li, X. Zou, X. Lian, D. Wang, L. Sun, T. Asefa and X. Zou, *Nano Energy*, 2017, **35**, 161–170.
- 15 Y. Hou, M. Qiu, G. Nam, M. G. Kim, T. Zhang, K. Liu, X. Zhuang, J. Cho, C. Yuan and X. Feng, *Nano Lett.*, 2017, **17**, 4202–4209.
- 16 X. Du, Z. Yang, Y. Li, Y. Gong and M. Zhao, *J. Mater. Chem. A*, 2018, **6**, 6938–6946.
- 17 C. Hu, L. Zhang, Z. J. Zhao, A. Li, X. Chang and J. Gong, *Adv. Mater.*, 2018, **30**, 1–8.
- 18 H. Du, R. Kong, F. Qu and L. Lu, *Chem. Commun.*, 2018, **54**, 10100–10103.
- 19 H. Zhang, Y. Li, T. Xu, J. Wang, Z. Huo, P. Wan and X. Sun, *J. Mater. Chem. A*, 2015, **3**, 15020–15023.

- 20 M. A. Lukowski, A. S. Daniel, F. Meng, A. Forticaux, L. Li and S. Jin, *J. Am. Chem. Soc.*, 2013, **135**, 10274–10277.
- 21 G. F. Chen, T. Y. Ma, Z. Q. Liu, N. Li, Y. Z. Su, K. Davey and S. Z. Qiao, *Adv. Funct. Mater.*, 2016, **26**, 3314–3323.
- 22 J. Yu, F. X. Ma, Y. Du, P. P. Wang, C. Y. Xu and L. Zhen, *ChemElectroChem*, 2017, **4**, 594–600.
- 23 N. Yang, C. Tang, K. Wang, G. Du, A. M. Asiri and X. Sun, *Nano Res.*, 2016, **9**, 3346–3354.
- 24 W. Zhu, M. Ren, N. Hu, W. Zhang, Z. Luo, R. Wang, J. Weng, L. Huang, Y. Suo and J. Wang, *ACS Sustain. Chem. Eng.*, 2018, **6**, 5011–5020.
- 25 M. Liu, Y. Jiao, S. Zhan and H. Wang, *Catal. Today*, 2020, **355**, 596–601.
- 26 Y. Xu, X. Chai, T. Ren, S. Yu, H. Yu, Z. Wang, X. Li, L. Wang and H. Wang, *Chem. Commun.*, 2020, **56**, 2151–2154.
- 27 P. Babar, A. Lokhande, V. Karade, B. Pawar, M. G. Gang, S. Pawar and J. H. Kim, *ACS Sustain. Chem. Eng.*, 2019, **7**, 10035–10043.
- 28 J. Y. Zhang, T. He, M. Wang, R. Qi, Y. Yan, Z. Dong, H. Liu, H. Wang and B. Y. Xia, *Nano Energy*, 2019, **60**, 894–902.
- 29 P. Xiong, X. Ao, J. Chen, J. G. Li, L. Lv, Z. Li, M. Zondode, X. Xue, Y. Lan and C. Wang, *Electrochim. Acta*, 2019, **297**, 833–841.
- 30 J. Ge, Y. Lai, M. Guan, Y. Xiao, J. Kuang and C. Yang, *Environ. Sci. Nano*, , DOI:10.1039/d0en01247e.
